# Supplementary material for: Covalent split protein fragment–DNA hybrids generated through N-terminus-specific modification of proteins by oligonucleotides
Source: Royal Society of Chemistry journal article supplement (doi:10.1039/b720013g), 2008-01-01
Supplement: b720013g.pdf [file b720013g.pdf]

## Supplementary Information

### **Covalent split protein fragment–DNA hybrids generated through N-terminus-specific modification of proteins by oligonucleotides**

Shuji Takeda, Shinya Tsukiji, Hiroshi Ueda, and Teruyuki Nagamune\*

*Department of Chemistry and Biotechnology, Department of Bioengineering, School of  
Engineering, and Center for NanoBio Integration, The University of Tokyo, 7-3-1 Hongo,*

*Bunkyo-ku, Tokyo 113-8656, Japan*

*E-mail: nagamune@bioeng.t.u-tokyo.ac.jp*

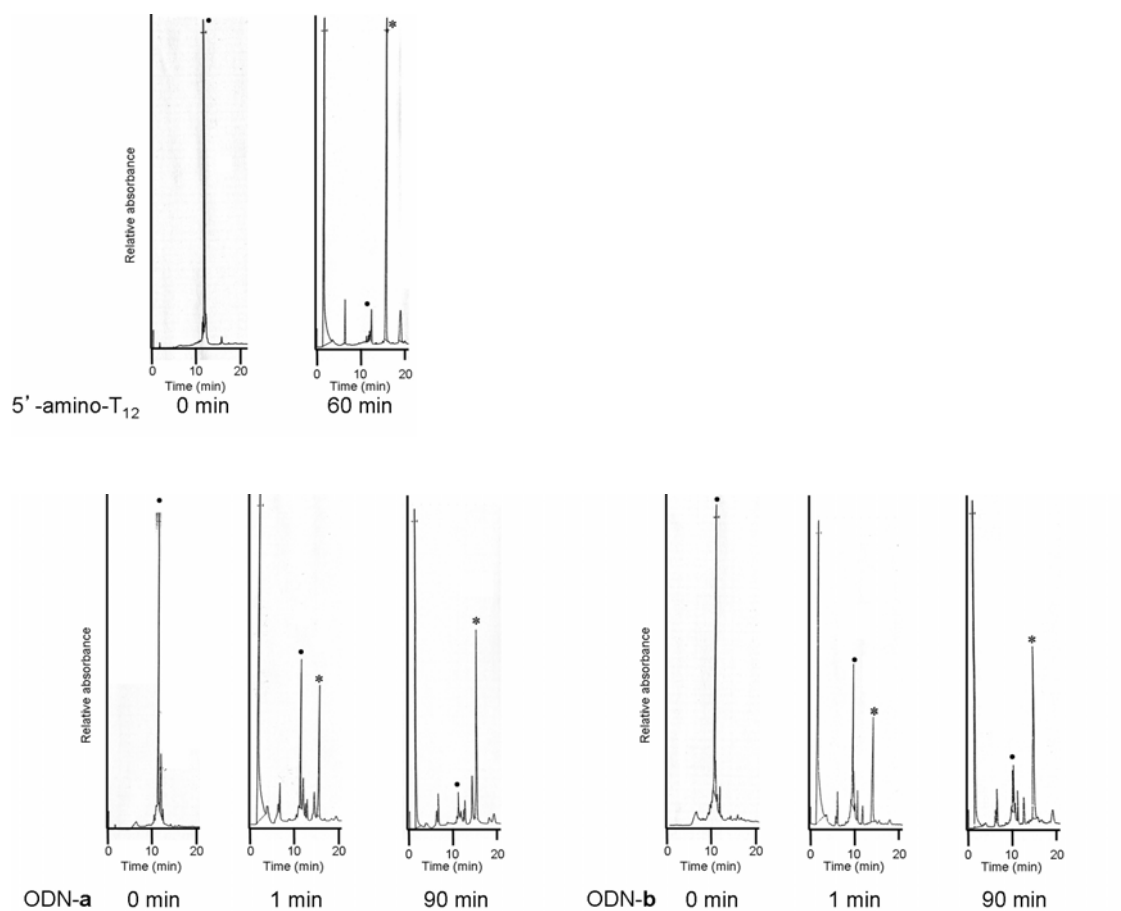

**Figure S1.** RP-HPLC analyses of the reaction of amine-terminated oligonucleotides with the reagent **3**. The amino-oligonucleotides and the reaction products TE-ODNs are denoted by • and \*, respectively. The reaction for 5'-amino-T<sub>12</sub> was performed under the almost same condition described in *Experimental section*. MALDI-TOF-MS (Matrix: 3-hydroxypicolinic acid): TE-T<sub>12</sub> [M+H]<sup>+</sup> = calcd 4045.72, obsd 4046.62.

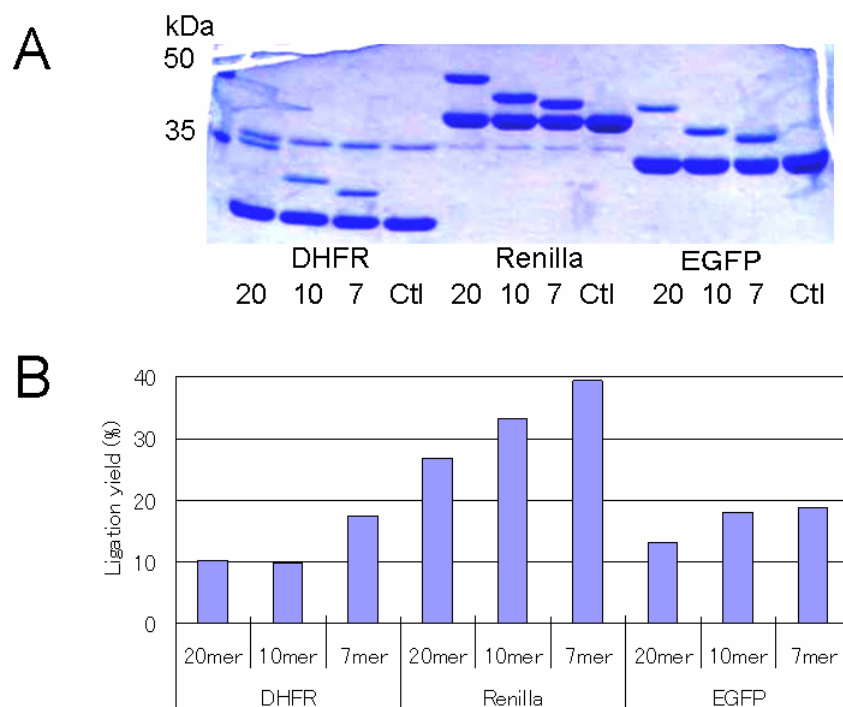

**Figure S2.** SDS-PAGE analysis of the ligation reaction between Cys-Proteins and 5'-TE-T oligomers. (A) Coomassie brilliant blue-stained gel image of the reaction mixtures. (B) Ligation yields determined by the gel image analyses. Each of the protein constructs containing an N-terminal cysteine were bacterially expressed and purified as described in *Experimental section*. To a solution of 9  $\mu$ L of Cys-Protein (32  $\mu$ M DHFR, 40  $\mu$ M *Renilla* luciferase, or 37  $\mu$ M EGFP) was added 3  $\mu$ l of 5'-TE-T oligomers (1 mM; 7, 10, or 20 mer), and the ligation solution was incubated at 4  $^{\circ}$ C for 48h. After the reaction, the mixtures were applied to SDS-PAGE analysis under reducing condition.
